# Supplementary material for: Effectiveness of Robot Interventions for Cognitive and Psychological Outcomes among Older Adults with Cognitive Impairment: A Meta-Analysis
Source: MDPI journal article supplement (doi:10.3390/healthcare11162341), 2023-08-19
Supplement: s1 [file s1]

### Supplementary materials

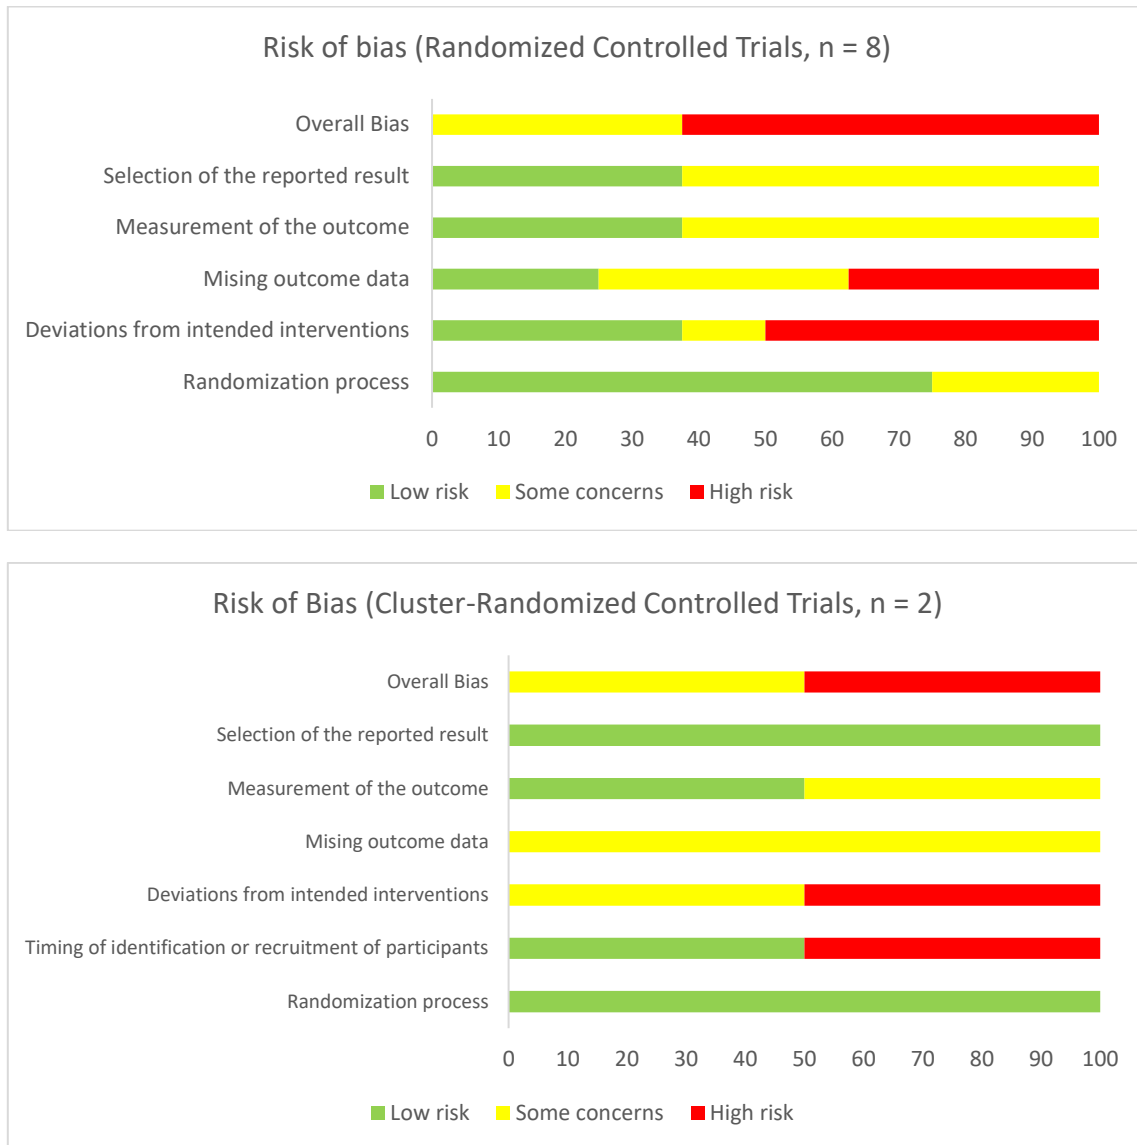

Figure S1. Estimated risk of bias across all included studies

Table S1. Search strategies for databases

| No.    | Search strategies                                                                                                                                                                                                                                                                                                                                                          | Filters          | Results    |
|--------|----------------------------------------------------------------------------------------------------------------------------------------------------------------------------------------------------------------------------------------------------------------------------------------------------------------------------------------------------------------------------|------------------|------------|
| PubMed |                                                                                                                                                                                                                                                                                                                                                                            |                  |            |
| #1     | (((((((((cognitive impairment[Title/Abstract]) OR (mild cognitive[Title/Abstract])) OR (MCI[Title/Abstract])) OR (cognitive decline[Title/Abstract])) OR (benign senescent forgetfulness[Title/Abstract])) OR (memory impairment[Title/Abstract])) OR (memory decline[Title/Abstract])) OR (dementia[Title/Abstract])) OR (Alzheimer[Title/Abstract])) OR "Dementia"[Mesh] |                  | 336,411    |
| #2     | (robot*[Title/Abstract]) OR ("Robotics"[Mesh])                                                                                                                                                                                                                                                                                                                             |                  | 59,019     |
| #3     | (randomized controlled trial[pt] OR controlled clinical trial[pt] OR randomized[tiab] OR randomised[tiab] OR placebo[tiab] OR clinical trials as topic[mesh:noexp] OR randomly[tiab] OR trial[ti] NOT (animals[mh] NOT humans [mh]))                                                                                                                                       |                  | 1,331,257  |
| #4     | #1 AND #2 AND #3                                                                                                                                                                                                                                                                                                                                                           |                  | 56         |
| #5     | #1 AND #2 AND #3                                                                                                                                                                                                                                                                                                                                                           | From 2015 - 2021 | 47         |
| #6     | #1 AND #2 AND #3                                                                                                                                                                                                                                                                                                                                                           | English          | 47         |
| Total  |                                                                                                                                                                                                                                                                                                                                                                            |                  | 47         |
| Embase |                                                                                                                                                                                                                                                                                                                                                                            |                  |            |
| #1     | 'cognitive impairment':ab,ti OR 'mild cognitive':ab,ti OR mci:ab,ti OR 'cognitive decline':ab,ti OR 'benign senescent forgetfulness':ab,ti OR 'memory impairment':ab,ti OR 'memory decline':ab,ti OR dementia:ab,ti OR alzheimer:ab,ti                                                                                                                                     |                  | 414,775    |
| #2     | 'dementia'/exp OR 'mild cognitive impairment'/exp                                                                                                                                                                                                                                                                                                                          |                  | 398,577    |
| #3     | #1 OR #2                                                                                                                                                                                                                                                                                                                                                                   |                  | 534,640    |
| #4     | robot*:ab,ti                                                                                                                                                                                                                                                                                                                                                               |                  | 79,691     |
| #5     | 'robotics'/exp                                                                                                                                                                                                                                                                                                                                                             |                  | 42,441     |
| #6     | #4 OR #5                                                                                                                                                                                                                                                                                                                                                                   |                  | 87,374     |
| #7     | 'randomized controlled trial'/exp                                                                                                                                                                                                                                                                                                                                          |                  | 675,523    |
| #8     | 'controlled clinical trial'/exp                                                                                                                                                                                                                                                                                                                                            |                  | 850,097    |
| #9     | 'clinical trial (topic)'/mj                                                                                                                                                                                                                                                                                                                                                |                  | 11,716     |
| #10    | randomized:ab,ti OR randomised:ab,ti OR placebo:ab,ti OR randomly:ab,ti OR trial:ti                                                                                                                                                                                                                                                                                        |                  | 1,583,554  |
| #11    | #7 OR #8 OR #9 OR #10                                                                                                                                                                                                                                                                                                                                                      |                  | 1,836,936  |
| #12    | 'animal'/exp                                                                                                                                                                                                                                                                                                                                                               |                  | 29,445,679 |
| #13    | 'human'/exp                                                                                                                                                                                                                                                                                                                                                                |                  | 23,786,146 |

|       |                   |                              |           |
|-------|-------------------|------------------------------|-----------|
| #14   | #12 NOT #13       |                              | 5,659,533 |
| #15   | #11 NOT #14       |                              | 1,668,664 |
| #16   | #3 AND #6 AND #15 |                              | 75        |
| #17   | #3 AND #6 AND #15 | From 2015 – 2021,<br>English | 57        |
| Total |                   |                              | 57        |

| No.              | Search strategies                                                | Filters      | Results   |
|------------------|------------------------------------------------------------------|--------------|-----------|
| Cochrane central |                                                                  |              |           |
| #1               | MeSH descriptor: [Dementia] explode all trees                    |              | 6,231     |
| #2               | (cognitive impairment):ti,ab,kw                                  |              | 12,381    |
| #3               | (mild cognitive):ti,ab,kw                                        |              | 7,597     |
| #4               | (MCI):ti,ab,kw                                                   |              | 2,723     |
| #5               | (cognitive decline):ti,ab,kw                                     |              | 4,964     |
| #6               | (benign senescent forgetfulness):ti,ab,kw                        |              | 2         |
| #7               | (memory impairment):ti,ab,kw                                     |              | 4,835     |
| #8               | (memory decline):ti,ab,kw                                        |              | 2,071     |
| #9               | (dementia):ti,ab,kw                                              |              | 13,665    |
| #10              | (Alzheimer):ti,ab,kw                                             |              | 11,641    |
| #11              | #1 OR #2 OR #3 OR #4 OR #5 OR #6 OR #7 OR #8 OR #9 OR #10        |              | 34,722    |
| #12              | (robot*):ti,ab,kw                                                |              | 5,402     |
| #13              | MeSH descriptor: [Robotics] explode all trees                    |              | 956       |
| #14              | #12 OR #13                                                       |              | 5,402     |
| #15              | MeSH descriptor: [Randomized Controlled Trial] explode all trees |              | 119       |
| #16              | MeSH descriptor: [Controlled Clinical Trial] explode all trees   |              | 128       |
| #17              | (randomized):ti,ab,kw                                            |              | 960,191   |
| #18              | (randomised):ti,ab,kw                                            |              | 960,191   |
| #19              | (placebo):ti,ab,kw                                               |              | 321,949   |
| #20              | (randomly):ti,ab,kw                                              |              | 264,739   |
| #21              | (trial):ti                                                       |              | 343,973   |
| #22              | MeSH descriptor: [Clinical Trials as Topic] this term only       |              | 33,265    |
| #23              | #15 OR #16 OR #17 OR #18 OR #19 OR #20 OR #21 OR #22             |              | 1,204,024 |
| #24              | MeSH descriptor: [Animals] explode all trees                     |              | 614,391   |
| #25              | MeSH descriptor: [Humans] explode all trees                      |              | 614,332   |
| #26              | #24 NOT #25                                                      |              | 59        |
| #27              | #23 NOT #26                                                      |              | 1,203,991 |
| #28              | #11 AND #14 AND #27                                              |              | 84        |
| #29              | #11 AND #14 AND #27                                              | Trials       | 81        |
| #30              | #11 AND #14 AND #27                                              | 2015 to 2021 | 71        |
